# Supplementary material for: Catalytic Adsorptive Stripping Voltammetric Determination of Germanium Employing the Oxidizing Properties of V(IV)-HEDTA Complex and Bismuth-Modified Carbon-Based Electrodes
Source: MDPI journal article supplement (doi:10.3390/membranes11070524), 2021-07-13
Supplement: s1 [file s1]

Supplementary material

## Catalytic adsorptive stripping voltammetric determination of germanium employing the oxidizing properties of V(IV)-HEDTA complex and bismuth-modified carbon-based electrodes

Agnieszka Królicka\*, Jerzy Zarebski and Andrzej Bobrowski

Department of Building Materials Technology, Faculty of Materials Science and Ceramics, AGH University of Science and Technology, Mickiewicza 30, 30-059 Krakow, Poland; krolicka@agh.edu.pl

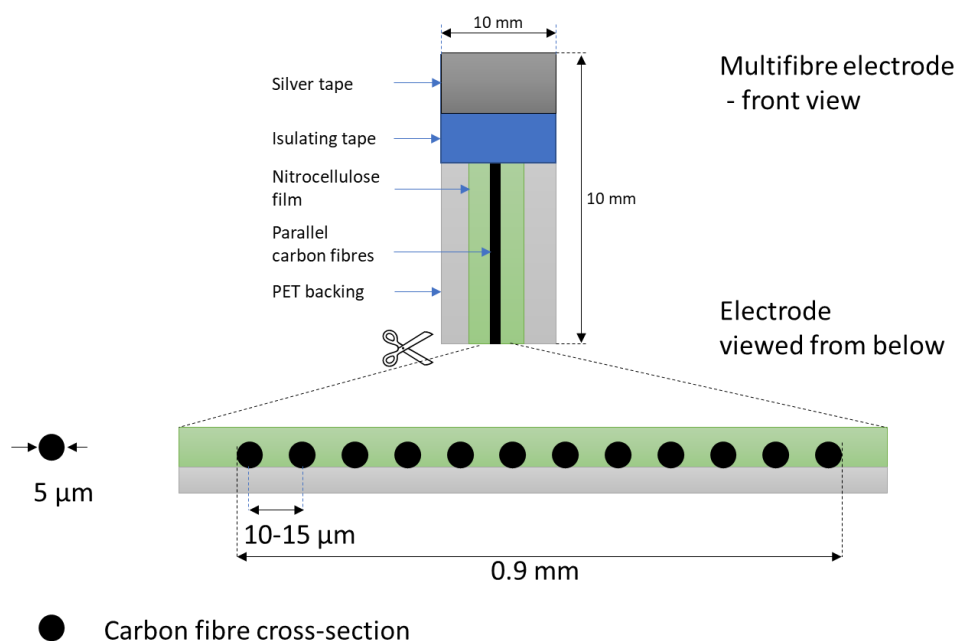

**Scheme S1.** Laboratory made multifibre electrode.

**Table S1.** Design matrix for response surface quadratic model.

| No | x <sub>1</sub> | x <sub>2</sub> | x <sub>3</sub> | E <sub>plat</sub><br>(V) | Q*<br>(mC) | c<br>(mM) | t <sub>1</sub> | t <sub>2</sub> | Peak current (μA)<br>(t <sub>1</sub> ) | Peak current (μA)<br>(t <sub>2</sub> ) | w <sub>1/2</sub><br>(V)<br>(t <sub>1</sub> ) | w <sub>1/2</sub><br>(V)<br>(t <sub>2</sub> ) |
|----|----------------|----------------|----------------|--------------------------|------------|-----------|----------------|----------------|----------------------------------------|----------------------------------------|----------------------------------------------|----------------------------------------------|
| 1  | -1             | -1             | -1             | -0.9                     | 10         | 13        | 10             | 14             | 3.6                                    | 3.8                                    | 0.067                                        | 0.065                                        |
| 2  | 1              | -1             | -1             | -1.5                     | 10         | 13        | 11             | 4              | 4.7                                    | 4.1                                    | 0.068                                        | 0.062                                        |
| 3  | -1             | 1              | -1             | -0.9                     | 50         | 13        | 14             | 6              | 5.6                                    | 4.7                                    | 0.066                                        | 0.058                                        |
| 4  | 1              | 1              | -1             | -1.5                     | 50         | 13        | 7              | 5              | 4.1                                    | 4.7                                    | 0.065                                        | 0.066                                        |
| 5  | -1             | -1             | 1              | -0.9                     | 10         | 43        | 2              | 9              | 3.8                                    | 2.7                                    | 0.068                                        | 0.077                                        |
| 6  | 1              | -1             | 1              | -1.5                     | 10         | 43        | 15             | 11             | 5.0                                    | 5.0                                    | 0.064                                        | 0.064                                        |
| 7  | -1             | 1              | 1              | -0.9                     | 50         | 43        | 8              | 13             | 5.9                                    | 6.0                                    | 0.062                                        | 0.065                                        |
| 8  | 1              | 1              | 1              | -1.5                     | 50         | 43        | 3              | 8              | 4.9                                    | 5.8                                    | 0.056                                        | 0.061                                        |
| 9  | 0              | 0              | 0              | -1.2                     | 30         | 28        | 12             | 7              | 4.78                                   | 5.0                                    | 0.065                                        | 0.065                                        |
| 10 | -1             | 0              | 0              | -0.9                     | 30         | 28        | 4              | 3              | 3.80                                   | 4.4                                    | 0.070                                        | 0.069                                        |
| 11 | 1              | 0              | 0              | -1.5                     | 30         | 28        | 13             | 10             | 4.76                                   | 5.1                                    | 0.062                                        | 0.065                                        |
| 12 | 0              | -1             | 0              | -1.2                     | 10         | 28        | 6              | 2              | 1.53                                   | 4.0                                    | 0.062                                        | 0.066                                        |
| 13 | 0              | 1              | 0              | -1.2                     | 50         | 28        | 9              | 1              | 5.88                                   | 5.3                                    | 0.062                                        | 0.061                                        |
| 14 | 0              | 0              | -1             | -1.2                     | 30         | 13        | 5              | 15             | 4.38                                   | 3.3                                    | 0.063                                        | 0.063                                        |
| 15 | 0              | 0              | 1              | -1.2                     | 30         | 43        | 1              | 12             | 3.02                                   | 5.3                                    | 0.060                                        | 0.069                                        |

\*value for electrodes with a surface area of 7.07 square millimeters (GC disc with a diameter of 3 mm)

w<sub>1/2</sub> – the half-width peak potential

t<sub>1</sub> and t<sub>2</sub> columns represent the random numbers indicating the order of experiments in trial 1 and trial 2. Every trial comprised 15 combinations of x<sub>1</sub>, x<sub>2</sub>, and x<sub>3</sub> factors

**Table S2.** Interpretation of the germanium peaks shown in Figure 5.

| Panel | Electrode type              | Shape            | Area (mm <sup>2</sup> ) | C <sub>Ge(IV)</sub> (nM) | E <sub>p(a)</sub> (V) | E <sub>p(b)</sub> (V) | E <sub>p(a)</sub> - E <sub>p(b)</sub> (V) | I <sub>p(a)</sub> (μA) | I <sub>p(b)</sub> (μA) | I <sub>p(a)</sub> - I <sub>p(b)</sub> (μA) |
|-------|-----------------------------|------------------|-------------------------|--------------------------|-----------------------|-----------------------|-------------------------------------------|------------------------|------------------------|--------------------------------------------|
| A     | BiFE/GC                     | Circle           | 7.07                    | 30                       | -0.705                | -0.705                | 0                                         | 2.54                   | 2.63                   | 0.08                                       |
| B     | BiFE/SPE                    | Circle           | 12.57                   | 30                       | -0.739                | -0.76                 | -0.021                                    | 2.00                   | 2.13                   | 0.13                                       |
| C     | BiFE/SPE <sub>meso</sub>    | Circle           | 12.57                   | 30                       | -0.739                | -0.751                | -0.012                                    | 0.91                   | 0.86                   | -0.06                                      |
| D     | BiFE/SPE <sub>or-meso</sub> | Circle           | 12.57                   | 30                       | -0.7                  | -0.705                | -0.005                                    | 0.87                   | 0.88                   | 0.01                                       |
| E     | BiFE/SPE <sub>g</sub>       | Circle           | 12.57                   | 30                       | -0.726                | -0.763                | -0.037                                    | 8.19                   | 6.67                   | -1.53                                      |
| F     | SPE/rGO                     | Circle           | 12.57                   | 30                       | -0.705                | -0.72                 | -0.015                                    | 2.08                   | 1.17                   | -0.92                                      |
| G     | BiFE/F                      | Array of circles | < 0.005                 | 300                      | -0.766                | -0.77                 | -0.004                                    | 0.005                  | 0.005                  | 0.00                                       |
| H     | Bi <sub>sp</sub>            | Square           | 80.00                   | 300                      | -0.748                | -0.775                | -0.027                                    | 4.58                   | 6.04                   | 1.46                                       |
